# Supplementary material
Source: ML conference proceedings conference paper supplement (https://proceedings.mlr.press/v97/yu19b.html)
Supplement: Supplementary file 1 [file yu19b-supp.pdf]

## A. Related literature

**Statistical learning methods.** Statistical learning contributed a lot to the problem of learning with noisy labels, especially in theoretical aspects. Statistical learning approaches can be categorized into three strands: surrogate loss, noise rate estimation and probabilistic modeling. For example, in the surrogate losses category, [Natarajan et al. \(2013\)](#) proposed an unbiased estimator to provide the noise corrected loss approach. [Masnadi-Shirazi & Vasconcelos \(2009\)](#) presented a robust non-convex loss, which is the special case in a family of robust losses. In the noise rate estimation category, both [Menon et al. \(2015\)](#) and [Liu & Tao \(2016\)](#) proposed a class-probability estimator using order statistics on the range of scores. [Sanderson & Scott \(2014\)](#) presented the same estimator using the slope of the ROC curve. In the probabilistic modeling category, [Raykar et al. \(2010\)](#) proposed a two-coin model to handle noisy labels from multiple annotators. [Yan et al. \(2014\)](#) extended this two-coin model by setting the dynamic flipping probability associated with instances.

**Deep learning approaches.** Deep learning approaches are prevalent to handle noisy labels ([Zhang & Sabuncu, 2018](#)). [Li et al. \(2017\)](#) proposed a unified framework to distill the knowledge from clean labels and knowledge graph, which can be exploited to learn a better model from noisy labels. [Veit et al. \(2017\)](#) trained a label cleaning network by a small set of clean labels, and used this network to reduce the noise in large-scale noisy labels. [Rodrigues & Pereira \(2018\)](#) added a crowd layer after the output layer for noisy labels from multiple annotators. [Tanaka et al. \(2018\)](#) presented a joint optimization framework to learn parameters and estimate true labels simultaneously. [Ren et al. \(2018\)](#) leveraged an additional validation set to adaptively assign weights to training examples. Similarly, based on a small set of trusted data with clean labels, [Hendrycks et al. \(2018\)](#) proposed a loss correction approach to mitigate the effects of label noise on deep neural network classifiers. [Ma et al. \(2018\)](#) developed a new dimensionality-driven learning strategy, which monitors the dimensionality of deep representation subspaces during training and adapts the loss function accordingly. [Wang et al. \(2018\)](#) proposed an iterative learning framework for training CNNs on datasets with open-set noisy labels. [Han et al. \(2018a\)](#) proposed a human-assisted approach that conveys human cognition of invalid class transitions, and derived a structure-aware deep probabilistic model incorporating a speculated structure prior. [Lee et al. \(2019\)](#) proposed a novel inference method to obtain a robust decision boundary under any softmax neural classifier pre-trained on noisy datasets. Their idea is to induce a generative classifier on top of hidden feature spaces of the discriminative deep model.

## B. Training details

For *MNIST* and *NEWS*, we train Co-teaching+ by default at the beginning of training. For other datasets, we use a warm-up strategy to achieve a higher test accuracy. Specifically, for *CIFAR-10*, we warm-up Co-teaching+ with training Co-teaching for the first 20 epochs (i.e., only conducting cross-update for the first 20 epochs). For *CIFAR-100*, we warm-up Co-teaching+ with training Co-teaching for the first 5 epochs. For *T-ImageNet*, we start disagreement-update in the middle of training, i.e., we warm-up Co-teaching+ with training Co-teaching for the first 100 epochs. For *Open-sets*, we warm-up Co-teaching+ with training two networks in parallel for the first 55 epochs, where both networks leverage the small-loss trick. Inevitably, there is few chance that we cannot find enough small-loss instances for cross-update. In that case, we only conduct disagreement-update in a mini-batch data during training.
